# Supplementary material for: Yuzu and Hesperidin Ameliorate Blood-Brain Barrier Disruption during Hypoxia via Antioxidant Activity
Source: MDPI journal article supplement (doi:10.3390/antiox9090843), 2020-09-09
Supplement: s1 [file s1]

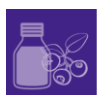

## Supplementary Figures &amp; Table

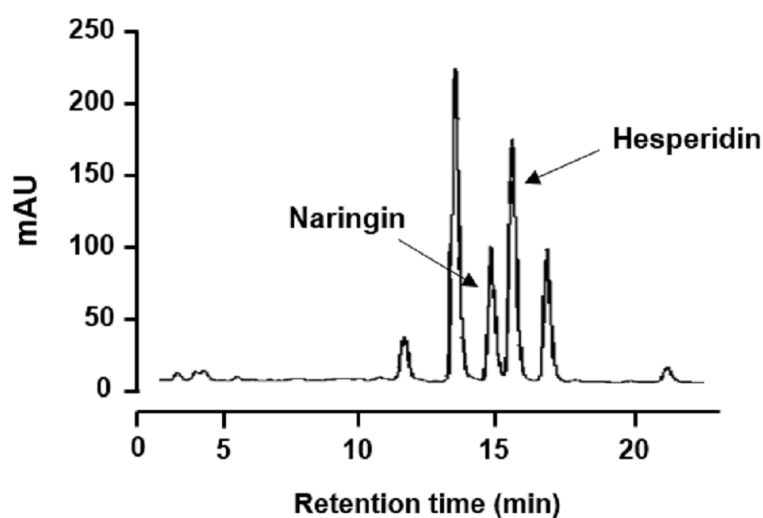

**Figure S1.** Chromatographic result for ethanolic Yuzu extract with detection at 280 nm.

**Table S1.** Contents of hesperidin (HSP) in ethanolic extract of Yuzu.

|                              | Hesperidin      | Naringin        |
|------------------------------|-----------------|-----------------|
| Contents (mg/g of F.wt Yuzu) | $0.97 \pm 0.08$ | $0.31 \pm 0.03$ |

All samples were tested in triplicate. Data are means  $\pm$ SDs. F.wt, fresh weight

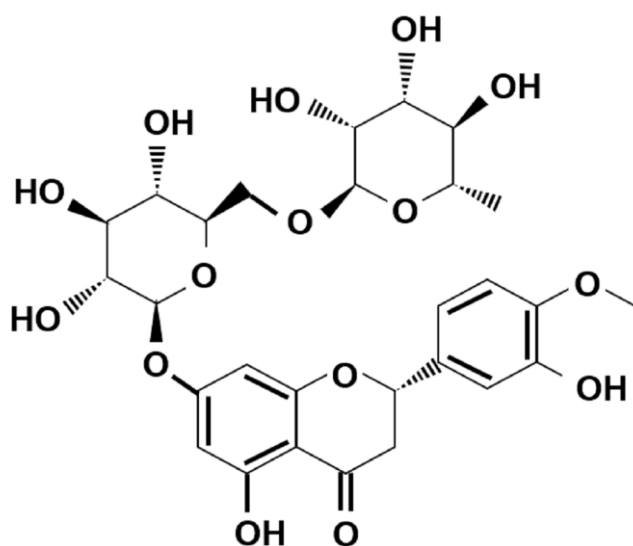

**Figure S2.** The structure of hesperidin.

## 11        **Supplementary methods**

### 12        **Extraction of Yuzu and quantitative HPLC analysis**

13        A mixture of 5 g (fresh weight) of sample and 25 mL of ethanol-DMSO (V/V; 50:10) was  
14        homogenized in a tube, and stirred on a magnetic stirrer for 10 min. Then 1 mL of the  
15        sample was centrifuged at 10,000g for 15 min at 4°C. The supernatant was collected and  
16        filtered through a 0.45 µm membrane filter before HPLC analysis. Reversed phase HPLC  
17        was used to assay hesperidin and naringin concentrations. An agilent 1100 Series System  
18        (Japan) consisting of a binary pump (DE43618438) and UV detector (DAD: G1315B) was  
19        used. The column was a Mightysil RP-C18 column (250 x 4.5; 2.5 i.d.), and the mobile  
20        phase was composed of (A) 2% acetic acid (aqueous) and (B) 0.5% acetic acid  
21        (aqueous)-acetonitrile (v/v; 50:50). Gradient elution was performed as follows: 0 min, 95:5;  
22        10 min, 90:10; 40 min, 60:40; 55 min, 45:55; 60 min, 20:80 and 65 min, 0:100. The mobile  
23        phase was filtered under vacuum through a 0.45 µm membrane filter before use, and a  
24        flow rate of 1 mL/min was used. UV absorbance was measured at 280 nm. The column  
25        temperature was maintained at 25°C.
